# Supplementary material for: Changes in a sensorimotor network, occipital network, and psychomotor speed within three months after focal surgical injury in pediatric patients with intracranial space-occupying lesions
Source: BMC Pediatr. 2022 Jun 1;22:321. doi: 10.1186/s12887-022-03348-5 (PMC9158303; doi:10.1186/s12887-022-03348-5)
Supplement: Supplementary file 1 — Additional file 1: [file 12887_2022_3348_MOESM1_ESM.xlsx]

## Sheet: WISC+CNSVS
Patient ID	Name	Gender(1=male, 2=female)	Age	Date of birth	Initial Symptom	Antiepileptic drugs	Location	Lateralization(L=left, R=right)	a(mm)	b(mm)	c(mm)	Volume	Degree of excision	Pathological diagnosis	WHO grade	Date of surgery	fMRI follow-up	Follow-up interval(days)
649426	sub001	1	9	2011.1.1	Seisure	Valproate	Parietal	L	34	32	30	17081.6	Subtotal	DNET	who1	2020-07-29	2020-08-07	9
651161	sub002	2	12	2008-05-30	Seisure	Not	Occipital	L	10	10	9	471	Gross total	ganglioglioma	who1	2020-08-14	2020-08-20	6
652695	sub003	2	12	2008-05-30	Seisure	Not	Frontal	L	16	32	23	6162.8	Subtotal	inflammatory disease	——	2020-08-31	2020-10-26	56
663929	sub004	1	13	2007.2.15	Headache	Not	Frontal	L	16	11	13	1197.4	Gross total	astrocytoma	who2	2021-01-13	2021-04-08	85
672578	sub005	1	9	2012-01-12	Seisure	Valproate	Temporal	R	15	12	10	942	Gross total	DNET	who1	2021-02-08	2021-05-06	87
674282	sub006	2	11	2009-02-27	Seisure	Not	Temporal	L	7	7	6	153.9	Gross total	ganglioglioma	who1	2021-03-10	2021-07-01	113
674274	sub007	2	6	2014-08-05	Seisure	Not	Frontal	R	20	20	15	3140	Gross total	DNET	who1	2021-02-26	2021-05-20	83
678048	sub008	1	13	2007-04-08	Seisure	Not	Temporal	L	40	34	33	23487.2	Gross total	pilomyxiod astrocytoma	who2	2021-03-24	2021-06-18	86
678049	sub009	1	9	2011-05-18	Asymptomatic	Not	Frontal	L	23	21	16	4044.3	Gross total	Degeneration	——	2021-03-24	2021-07-15	113
685217	sub010	2	13	2008-02-12	Headache	Not	Frontal	R	13	32	15	3265.6	Gross total	epidermoid cyst	——	2021-05-12	2021-10-13	154
689917	sub011	1	13	2008-05-09	Seisure	Levetiracetam	Frontal	R	11	11	14	886.5	Gross total	ganglioglioma	who1	2021-06-10	2021-10-20	132
689420	sub012	1	14	2007-01-06	Seisure	Not	Frontal	L	39	26	33	17511.8	Gross total	astrocytoma	who2	2021-06-08	2021-10-20	134
691930	sub013	1	7	2014-03-07	Seisure	Levetiracetam	Frontal	R	14	15	17	1868.3	Gross total	Mixed neuronal-gial tumor	who1	2021-06-24	2021-10-24	122
697931	sub014	2	8	2012-07-31	Seisure	Not	Parietal	L	17	36	26	8327.3	Gross total	Angiocentric glioma	who1	2021-08-03	2021-08-10	7
701221	sub015	1	8	2012-12-10	Seisure	Valproate	Frontal	L	39	18	31	11388.8	Gross total	DNET	who1	2021-08-19	2021-08-24	5
